# Supplementary material
Source: publisher site journal article supplement (https://www.dovepress.com/get_supplementary_file.php?f=220349-A.docx)
Supplement: Supplementary file 1 [file get_supplementary_file.php]

Appendix A. English version of a bullying questionnaire

The following are questions about your experiences in school or the community during your childhood. Please answer all the questions.

0: never

1: rarely

2: sometimes

3: often

4: always

1. In school or in the community, I experienced being left out, ignored, or talked about behind my back.

0 / 1 / 2 / 3 / 4

2. In school or in the community, I experienced being teased, called names, threatened, or having unpleasant things said to me.

0 / 1 / 2 / 3 / 4

3. In school or in the community, I experienced being hit lightly, or punched or kicked while pretending to play.

0 / 1 / 2 / 3 / 4

4. In school or in the community, I experienced being hit hard, punched, or kicked hard.

0 / 1 / 2 / 3 / 4

5. In school or in the community, I experienced being robbed of money or other possessions, or having my belongings damaged.

0 / 1 / 2 / 3 / 4
